# Supplementary material
Source: ML conference proceedings conference paper supplement (https://openaccess.thecvf.com/content/ICCV_2017/html/Supancic_Tracking_as_Online_ICCV_2017_paper.html)
Supplement: Supplementary file 1 [file Supancic_Tracking_as_Online_ICCV_2017_supplemental.pdf]

Archive with 3 entries (2 files):
- 266_Sup/
- 266_Sup/266_Sup.pdf
- 266_Sup/video_small.mp4
