# Supplementary material
Source: ML conference proceedings conference paper supplement (https://openaccess.thecvf.com/content/ICCV_2017/html/Supancic_Tracking_as_Online_ICCV_2017_paper.html)
Supplement: Supplementary file 1 [file Supancic_Tracking_as_Online_ICCV_2017_supplemental.pdf › 266_Sup/266_Sup.pdf]

# Long-Term Tracking Through Policy Learning - Supplemental

James Supančič, III  
University of California, Irvine  
jsupanci@uci.edu

Deva Ramanan  
Carnegie Mellon University  
deva@cs.cmu.edu

## A. Introduction

This document provides additional implementation details for our proposed algorithms. We also encourage you to view the supplementary video, where we better explain our method’s qualitative behavior. We begin with a detailed overview of our tracker’s test-time pipeline in Sec. B. Then, in Sec. C we describe how we implement our Q-functions. Finally, we describe our policy learning algorithm (Sec. D) and offline training heuristics (Sec. E).

## B. The p-track Pipeline

In Fig. 1 we show a flowchart for our tracker’s test-time pipeline. We use a UML Activity Diagram [3].

- Define the tracker’s input state as  $s_i = ((\theta_{i-1}, h_{i-1}), o_i)$ . This state consists of the previous appearance model  $\theta_{i-1}$ , previous localization heatmap  $h_{i-1}$  and the current observation  $o_i$ . Importantly, extract the localization heatmap predicted for the previous frame  $h_{i-1}$ . We will use  $h_{i-1} \in s_i$  as the argument of our decision function.
- Evaluate the  $Q$ -function on this heatmap for the **track** and **reinit** actions. Compare the value of  $Q_w(s_i, \mathbf{t})$  to the value of  $Q_w(s_i, \mathbf{r})$  and choose the action with the greater value.
- If we decide to **track**
  - Extract a ROI from the current observation image, centered at the mode of the previous localization heatmap.
  - Evaluate the FCNT [4] (Sec 4.2) GNet and SNet models to predict two localization heatmaps.
  - Based on FCNT’s distractor selection (Sec 4.2 of [4]), decide which heatmap to use. This becomes  $h_i$ .
- If we decide to **reinit**
  - Extract a random ROI from the current observation image.
  - Evaluate the FCNT [4] (Sec 4.2) GNet and SNet models to predict two location prediction heatmaps.

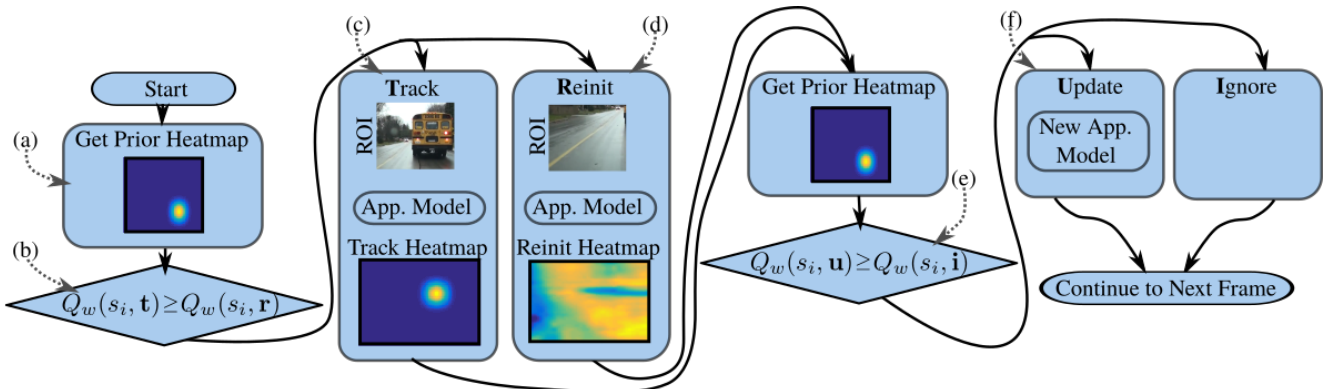

Figure 1. **p-track**’s test-time pipeline is shown above as a standard flow chart. We explain each step in Sec. B.

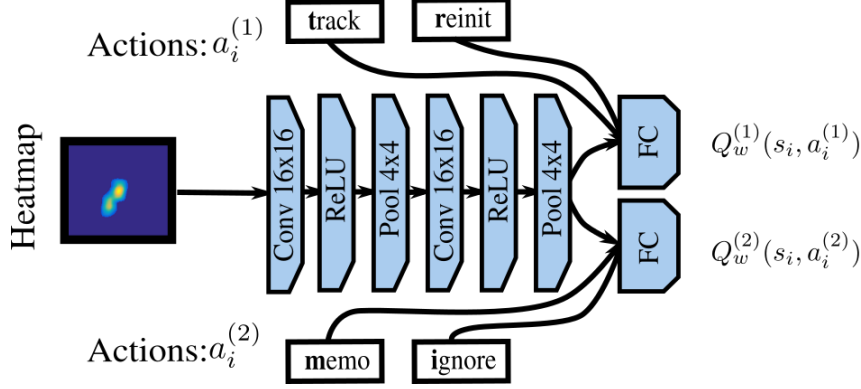

Figure 2. **Q-CNNs:** We implement our two  $Q$ -functions (for track vs reinit and update vs ignore) using the architecture shown above. Note that  $Q_w^{(1)}$  and  $Q_w^{(2)}$  share the first two convolutional layers. But, each has its own fully-connected layer.

- Based on FCNT’s distractor selection (Sec 4.2 of [4]), decide which heatmap to use. This becomes  $h_i$ .
- e. Now evaluate the  $Q$ -function for each of the candidate actions (**update** or **ignore**) using the old heatmap  $h_{i-1}$ . We could instead use the newly predicted heatmap  $h_i$ , but we don’t <sup>1</sup>.
- f. If we decide to **update**
  - Assume the tracker correctly localized the target. Use this assumption to define new labeled training examples for the appearance model.
  - Update the appearance model as described in [4] (Sec 4.3).
- g. Repeat on the next frame.

## C. Q’s Functional Form

We will explain how we train our  $Q$ -functions in the next section. But first, we introduce their architecture. We implement our two  $Q$ -functions (for track vs reinit and update vs ignore) using a single CNN with shared weights. Sharing weights can help mitigate overfitting. But, more importantly, the experience replay Q-learning algorithm [1, 2] is defined using a single  $Q$  function. For training, we define our single  $Q$ -function,  $Q_w = Q_w^{(1)} + Q_w^{(2)}$ , with  $Q_w^{(1)}$  being for track vs reinit and  $Q_w^{(2)}$  being for update vs ignore. We deliberately use addition to define our unified  $Q$  function because it makes our two  $Q$ -functions (for each binary decision) independent:

$$\arg \max_{a_i^{(1)}, a_i^{(2)}} Q_w(s_i, (a_i^{(1)}, a_i^{(2)})) = \left( \arg \max_{a_i^{(1)}} Q_w^{(1)}(s_i, a_i^{(1)}), \arg \max_{a_i^{(2)}} Q_w^{(2)}(s_i, a_i^{(2)}) \right) \quad (1)$$

where we have re-encoded our unified  $Q$ -function’s four-bit one-hot encoding  $a_i$  by decomposing it into two two-bit one-hot arguments:  $a_i^{(1)}$  and  $a_i^{(2)}$ . In Fig. 2 we show a more detailed schematic of the multi-layer CNN we train to approximate  $Q(s_i, a_i)$ .

## D. Interactive Policy Learning

In Fig. 3 we show pseudocode and a flowchart for our interactive training algorithm. The outer loop interactively processes videos from the Internet to improve our tracker’s policy. It first (L2) downloads a new video from the Internet. In the first frame, a human marks a target to track (L3). Then, for each frame in the video, our tracker tries to track the target using its current policy (L5–L11) to choose tracking actions  $a_i$ . For each frame, a human rewards the tracker  $r_i = 1$  if it correctly tracked the target on frame  $i$ . After each frame, we record the tracker’s state  $s_i$ , action  $a_i$ , reward  $r_i$  and nextstate  $s_{i+1}$  into our experience replay memory  $\mathcal{D} = (s_i, a_i, r_i, s_{i+1})$  on L13. Finally, we re-optimize our policy against our experience memory database on L14, as described in the main paper. Empirically, our policy improves (on average) with each iteration of the outer loop.

<sup>1</sup>Empirically using  $h_i$  does not improve performance. Using  $h_{i-1}$  here is computationally faster because our implementation actually evaluates (b) and (e) in parallel.

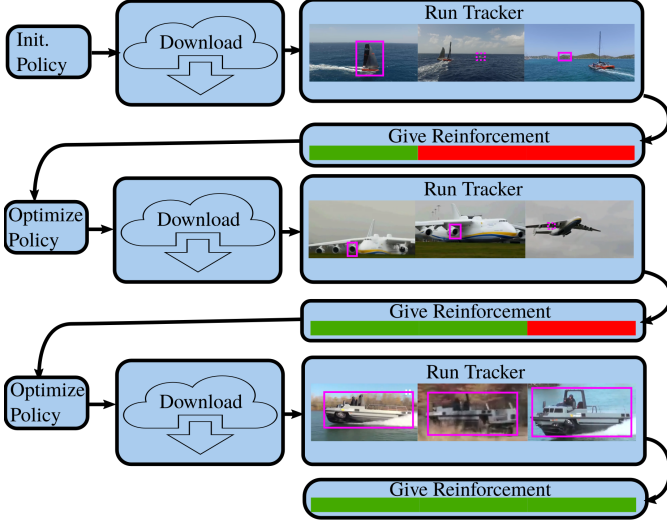

```

1 while True do
2   Download random video;
3    $\theta_1 \leftarrow \text{UPDATE}(h_1, o_1)$ ; /* manually init. */
4   forall  $i \in \text{video}$  do
5      $s_i = ((\theta_{i-1}, h_{i-1}), o_i)$ ;
6     /* track or reinitialize? */
7     if  $Q_w(s_i, t) > Q_w(s_i, r)$  then
8        $h_i \leftarrow \text{TRACK}(h_{i-1}, \theta_{i-1}, o_i)$ ;  $a_i^{(1)} \leftarrow 1$ ;
9     else  $h_i \leftarrow \text{REINIT}(\theta_{i-1}, o_i)$ ;  $a_i^{(1)} \leftarrow 0$ ;
10    /* update or ignore? */
11    if  $Q_w(s_i, m) > Q_w(s_i, i)$  then
12       $\theta_i \leftarrow \text{UPDATE}(\theta_{i-1}, h_i, o_i)$ ;  $a_i^{(2)} \leftarrow 1$ ;
13    else  $\theta_i \leftarrow \theta_{i-1}$ ;  $a_i^{(2)} \leftarrow 0$ ;
14    /* manually evaluate the performance */
15     $r_i \leftarrow \text{annotated frame correct?}$ ;
16    /* update experience database */
17     $\mathcal{D} \leftarrow \mathcal{D} \cup (s_i, a_i, r_i, s_{i+1})$ 
18   $w \leftarrow \arg \min L(w; \mathcal{D})$ 

```

Figure 3. Our Reinforcement Learning flowchart is shown above (left). On the right, we list the pseudo-code.

## E. Implementing the Update Heuristic

Recall that our offline (train-time) heuristic decides when to set the target action  $a_i^*$  to **update**. Our tracker could retrain (*i.e.* update) its appearance model (as described in Sec 4.3 of [4]) using its localization at frame  $i$  to get new parameters  $\theta'$  for GNet and SNet. Or, it may choose not to update its appearance model  $\theta$ . We, let  $\Delta_+$  indicate the number of future frames where updating the appearance model increases confidence at correct localizations, let  $\Delta_-$  be the number future frames where the update decreases confidence at the incorrect localizations, and let  $N$  be the total number of remaining frames. Our heuristic sets  $a_i^*$  to **update** if and only if (on average) updating increases confidence for correct localizations and reduces confidence for incorrect localizations:  $\Delta_+ + \Delta_- > .5N$ . During training, we have reinforcement  $r_j$  which tells us which frames the tracker got correct. So we may formally define  $\Delta_+$  and  $\Delta_-$  as

$$\Delta_+ = \frac{1}{\sum_{j>i} r_j} \sum_{j>i} r_j \mathbf{I}[\rho_j^{\theta'} > \rho_j^\theta] \quad (2)$$

$$\Delta_- = \frac{1}{\sum_{j>i} \bar{r}_j} \sum_{j>i} \bar{r}_j \mathbf{I}[\rho_j^{\theta'} < \rho_j^\theta] \quad (3)$$

where  $\rho_j^\theta$  is the confidence of the appearance model  $\theta$  at the tracker's test-time localization in frame  $j$ .

## References

- [1] S. Adam, L. Busoniu, and R. Babuska. Experience replay for real-time reinforcement learning control. *IEEE Transactions on Systems, Man, and Cybernetics*, 42(2):201–212, 2012. [2](#)
- [2] V. Mnih, K. Kavukcuoglu, D. Silver, A. A. Rusu, J. Veness, M. G. Bellemare, A. Graves, M. Riedmiller, A. K. Fidjeland, G. Ostrovski, et al. Human-level control through deep reinforcement learning. *Nature*, 518(7540):529–533, 2015. [2](#)
- [3] J. Rumbaugh, I. Jacobson, and G. Booch. *Unified modeling language reference manual, the*. Pearson Higher Education, 2004. [1](#)
- [4] L. Wang, W. Ouyang, X. Wang, and H. Lu. Visual Tracking with Fully Convolutional Networks. *CVPR*, 2015. [1](#), [2](#), [3](#)
